# Supplementary material for: Conformationally averaged vertical detachment energy of finite size NO3−·nH2O clusters: a route connecting few to many
Source: Royal Society of Chemistry journal article supplement (doi:10.1039/c0cp02556a), 2011-01-01
Supplement: c0cp02556a.pdf [file c0cp02556a.pdf]

### Supporting Information

The fully optimized structures calculated at B3LYP/6-311++G(d,p) level of theory for (I)  $\text{NO}_3^- \cdot \text{H}_2\text{O}$ ; (II)  $\text{NO}_3^- \cdot 2\text{H}_2\text{O}$ ; (III)  $\text{NO}_3^- \cdot 3\text{H}_2\text{O}$ ; (IV)  $\text{NO}_3^- \cdot 4\text{H}_2\text{O}$ ; (V)  $\text{NO}_3^- \cdot 5\text{H}_2\text{O}$ , (VI)  $\text{NO}_3^- \cdot 8\text{H}_2\text{O}$  and (VIII)  $\text{NO}_3^- \cdot 10\text{H}_2\text{O}$  clusters. Marked alphabets in lower case are used to refer different minimum energy conformers for each hydrated cluster size arranged in order of stability showing 'a' as the most stable one. N atoms are shown by marking 'N' on the spheres, the smallest spheres refer to H atoms and the rest corresponds to O atoms in each structure.

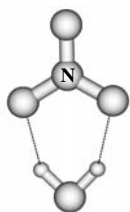

**I-a**

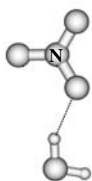

**I-b**

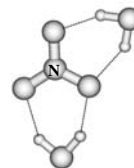

**II-a**

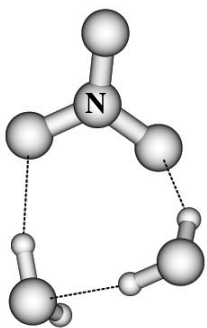

**II-b**

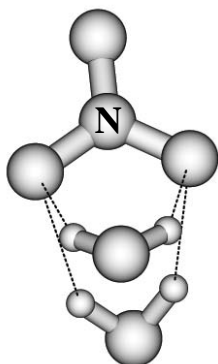

**II-c**

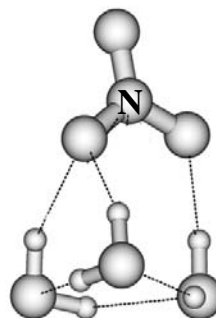

**III-a**

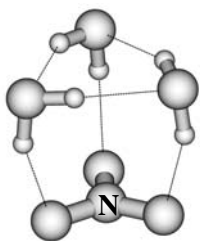

**III-b**

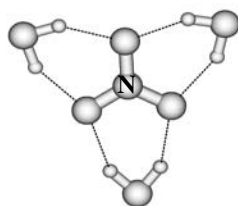

**III-c**

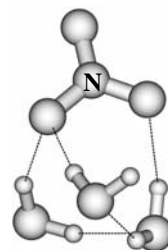

**III-d**

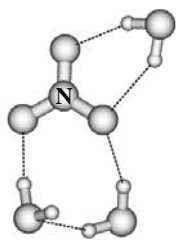

**III-e**

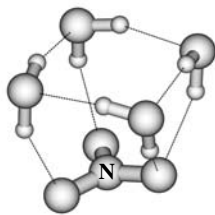

**IV-a**

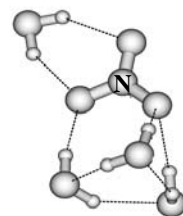

**IV-b**

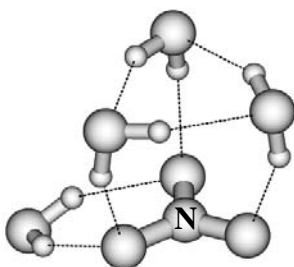

**IV-c**

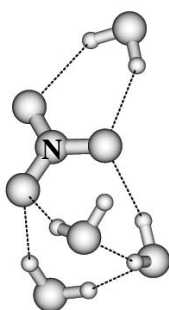

**IV-d**

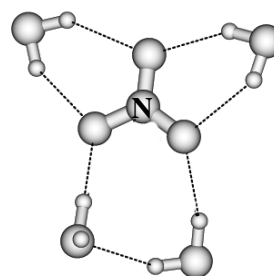

**IV-e**

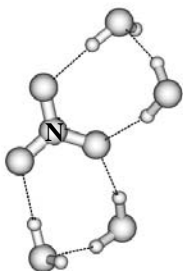

**IV-f**

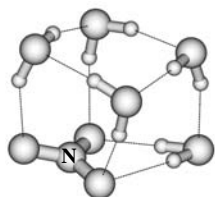

**V-a**

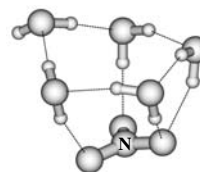

**V-b**

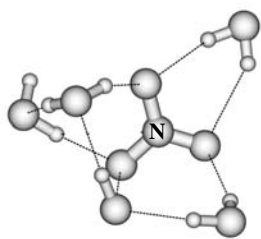

**V-c**

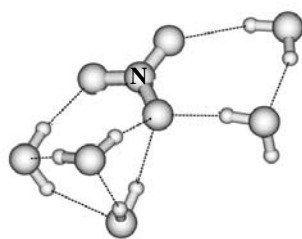

**V-d**

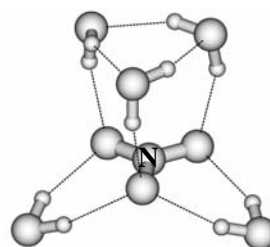

**V-e**

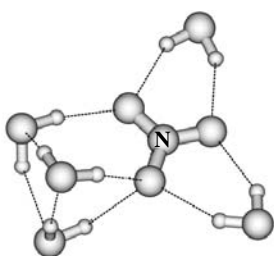

**V-f**

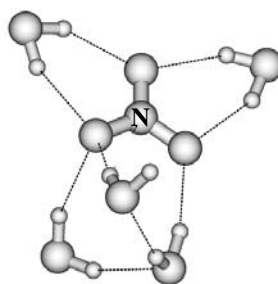

**V-g**

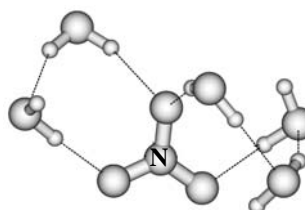

**V-h**

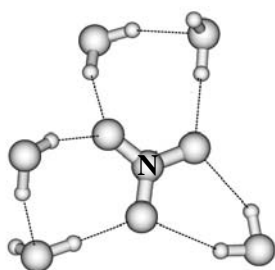

**V-i**

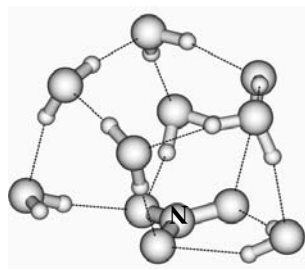

**VI-a**

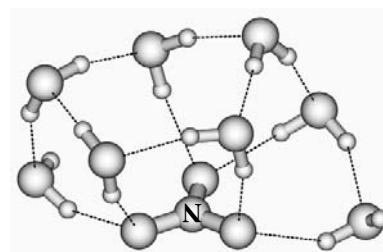

**VI-b**

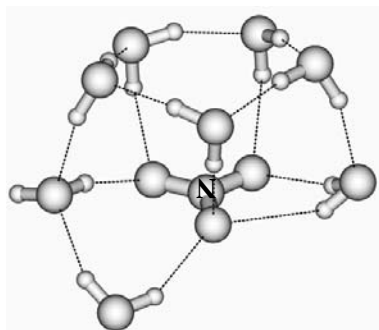

**VI-c**

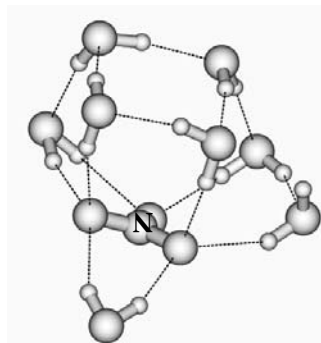

**VI-d**

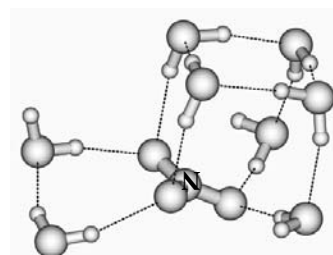

**VI-e**

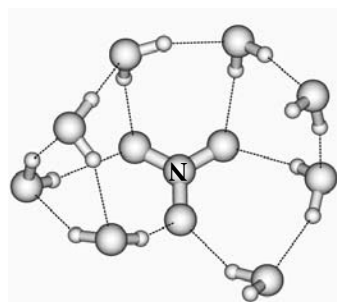

**VI-f**

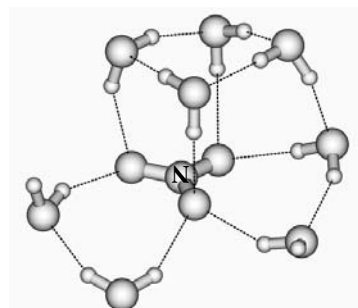

**VI-g**

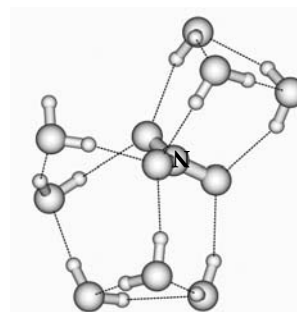

**VI-h**

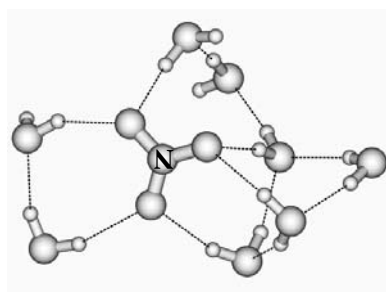

**VI-i**

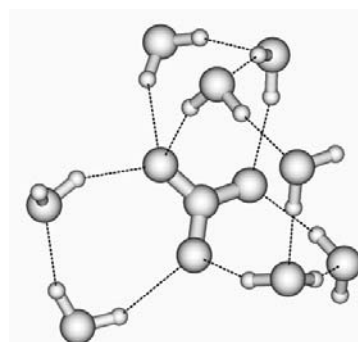

**VI-j**

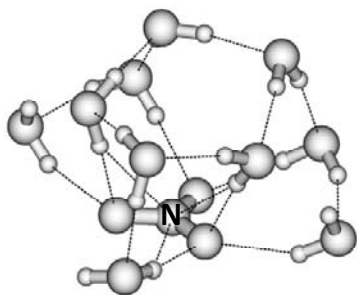

**VII-a**

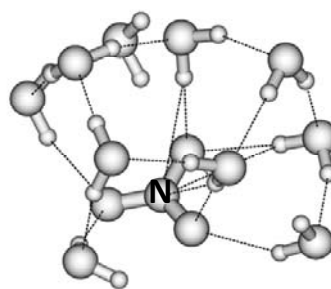

**VII-b**

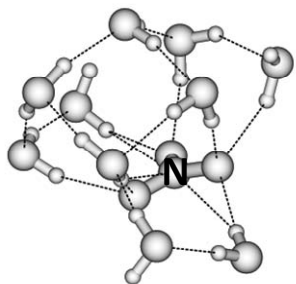

**VII-c**

## 2. Table 1

Calculated vertical detachment energy in eV of all the conformers of a particular size for  $\text{NO}_3^- \cdot n\text{H}_2\text{O}$  ( $n=1-5, 8 \text{ \& } 10$ ) clusters at B3LYP/6-311++G(d,p) level of theory.

| Clusters                                  | Conformers | Vertical detachment energy (eV) |
|-------------------------------------------|------------|---------------------------------|
| $\text{NO}_3^- \cdot \text{H}_2\text{O}$  | I-A        | 4.93                            |
|                                           | I-b        | 4.75                            |
| $\text{NO}_3^- \cdot 2\text{H}_2\text{O}$ | II-a       | 5.52                            |
|                                           | II-B       | 5.30                            |
|                                           | II-c       | 5.45                            |
| $\text{NO}_3^- \cdot 3\text{H}_2\text{O}$ | III-a      | 5.66                            |
|                                           | III-b      | 5.55                            |
|                                           | III-c      | 6.00                            |
|                                           | III-d      | 5.73                            |
|                                           | III-e      | 5.95                            |
| $\text{NO}_3^- \cdot 4\text{H}_2\text{O}$ | IV-a       | 5.86                            |
|                                           | IV-b       | 6.20                            |
|                                           | IV-c       | 6.11                            |
|                                           | IV-d       | 6.50                            |
|                                           | IV-e       | 6.33                            |
|                                           | IV-f       | 6.09                            |

|                                             |                                             |       |
|---------------------------------------------|---------------------------------------------|-------|
| $\text{NO}_3^- \cdot 0.5\text{H}_2\text{O}$ | V-a                                         | 6.18  |
|                                             | V-b                                         | 5.95  |
|                                             | V-c                                         | 6.43  |
|                                             | V-d                                         | 6.34  |
|                                             | V-e                                         | 6.56  |
|                                             | V-f                                         | 6.62  |
|                                             | V-g                                         | 6.85  |
|                                             | V-h                                         | 6.33  |
|                                             | V-I                                         | 6.49  |
| $\text{NO}_3^- \cdot 0.8\text{H}_2\text{O}$ | VI-a                                        | 7.00  |
|                                             | VI-b                                        | 6.72  |
|                                             | VI-c                                        | 6.70  |
|                                             | VI-d                                        | 6.81  |
|                                             | VI-e                                        | 6.70  |
|                                             | VI-f                                        | 6.80  |
|                                             | VI-g                                        | 6.75  |
|                                             | VI-h                                        | 7.10  |
|                                             | VI-i                                        | 6.65  |
|                                             | VI-j                                        | 7.09  |
|                                             | $\text{NO}_3^- \cdot 1.0\text{H}_2\text{O}$ | VII-a |
| VII-a                                       |                                             | 7.04  |
| VII-a                                       |                                             | 6.97  |
